# Supplementary material
Source: Springer Nature journal article supplement (http://www.springermedizin.de/resource/supplementary/12888_2009_718_MOESM6_ESM.pdf/9478276)
Supplement: MOESM6 [file 9478276]

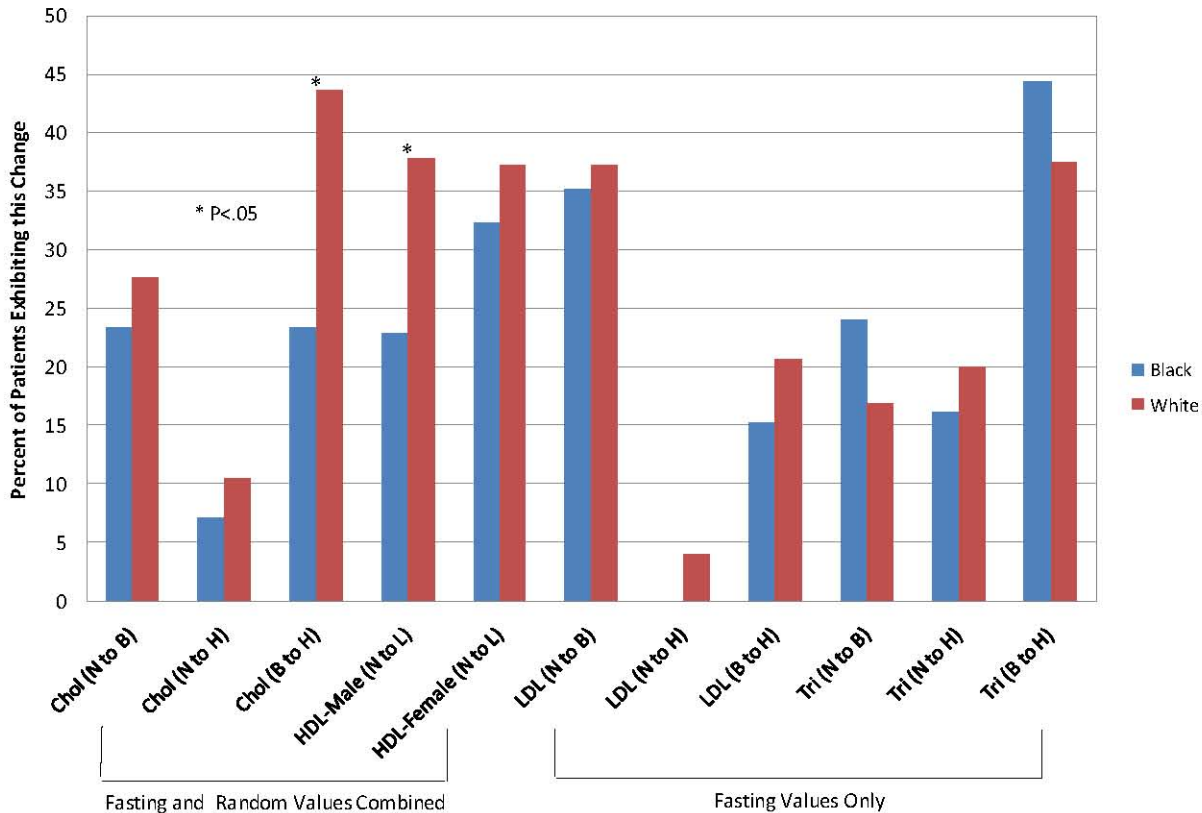

Abbreviation: L=Low; N=Normal; B=Borderline; H=High

Cholesterol (Fasting and Random): Normal (<200mg/dl); Borderline ( $\geq$ 200mg/dl and <240mg/dl); High ( $\geq$ 240mg/dl)

HDL Males (Fasting and Random): Low (<40mg/dl); Normal ( $\geq$ 40mg/dl)

HDL Females (Fasting and Random): Low (<50mg/dl); Normal ( $\geq$ 50mg/dl)

Fasting LDL: Normal (<100mg/dl); Borderline (100mg/dl to 159mg/dl); High ( $\geq$ 160mg/dl)

Fasting Triglycerides: Normal (<150mg/dl); Borderline (150 to 199mg/dl); High ( $\geq$ 200mg/dl)
